Exams are available online only at [cme.psychiatryonline.org](http://cme.psychiatryonline.org)

## INFORMATION TO PARTICIPANTS

**OBJECTIVES.** After evaluating a specific journal article published in the American Journal of Psychiatry, participants should be able to demonstrate an increase in their knowledge of clinical medicine. Participants should be able to understand the contents of a selected research or review article and to apply the new findings to their clinical practice.

**PARTICIPANTS.** This program is designed for all psychiatrists in clinical practice, residents in Graduate Medical Education programs, medical students interested in psychiatry, and other physicians who wish to advance their current knowledge of clinical medicine.

**EXPLANATION OF HOW PHYSICIANS CAN PARTICIPATE AND EARN CREDIT.** In order to earn CME credit, subscribers should read through

the material presented in the article. After reading the article, complete the CME quiz online at [cme.psychiatryonline.org](http://cme.psychiatryonline.org) and submit your evaluation and study hours (up to 1 AMA PRA Category 1 Credit™).

**CREDITS.** The APA designates this educational activity for a maximum of 1 AMA PRA Category 1 Credit™. Physicians should only claim credit commensurate with the extent of their participation in the activity.

The American Psychiatric Association (APA) is accredited by the Accreditation Council for Continuing Medical Education (ACCME) to provide continuing medical education (CME) for physicians.

**Estimated Time to Complete: 1 Hour**

Begin date November 1, 2006 – End date October 31, 2008

## EXAMINATION QUESTIONS

Select the single best answer for each question below.

### A Clinical Approach to Mild Cognitive Impairment

Paul B. Rosenberg et al.

Am J Psychiatry 2006; 163:1884-1890

**QUESTION 1.** A 72-year-old man complains that for 1 year he has had trouble remembering names, no longer can do the Sunday *New York Times* crossword puzzle, but has no other difficulties in his daily life. His score on the Mini-Mental State Exam is 28 out of 30, missing two items on short-term recall. Neuropsychologic testing revealed deficits in episodic memory and category fluency (expressive language). Which of the following is the most likely diagnosis?

- A. Amnesic mild cognitive impairment, multiple domain
- B. Normal cognitive changes for his age
- C. Nonamnesic mild cognitive impairment, multiple domain
- D. Dementia of the Alzheimer type

**QUESTION 2.** In distinguishing a diagnosis of mild cognitive impairment from dementia, which of the following is most useful?

- A. Obtaining a history of daily functioning from patient and informant.
- B. Magnetic resonance imaging of the brain.
- C. Neuropsychological testing.
- D. Mini-Mental State Exam and Clock Drawing Test.

**QUESTION 3.** Well-established treatments for preventing progression of mild cognitive impairment to dementia include which of the following?

- A. Alpha-Tocopherol (vitamin E)
- B. Memantine
- C. Nonsteroidal anti-inflammatory drugs
- D. None of the above

## EVALUATION QUESTIONS

This evaluation form is adapted from the *MedBiquitous Journal-Based Continuing Education Guidelines 28 November 2005*.

This evaluation will appear online at the end of each CME course. Participants must complete this evaluation in order to receive credit. Select the response which best indicates your reaction to the following statements about this activity.

**STATEMENT 1.** The activity achieved its stated objectives

- 1. Strongly agree
- 2. Agree
- 3. Neutral
- 4. Disagree
- 5. Strongly disagree

**STATEMENT 2.** The activity was relevant to my practice.

- 1. Strongly agree
- 2. Agree
- 3. Neutral
- 4. Disagree
- 5. Strongly disagree

**STATEMENT 3.** I plan to change my current practice based on what I learned in the activity.

- 1. Strongly agree
- 2. Agree
- 3. Neutral
- 4. Disagree
- 5. Strongly disagree

**STATEMENT 4.** The activity validated my current practice.

- 1. Strongly agree
- 2. Agree
- 3. Neutral
- 4. Disagree
- 5. Strongly disagree

**STATEMENT 5.** The activity provided sufficient scientific evidence to support the content presented.

- 1. Strongly agree
- 2. Agree
- 3. Neutral
- 4. Disagree
- 5. Strongly disagree

**STATEMENT 6.** The activity was free of commercial bias toward a particular product or company.

- 1. Strongly agree
- 2. Agree
- 3. Neutral
- 4. Disagree
- 5. Strongly disagree

Exams are available online only at [cme.psychiatryonline.org](http://cme.psychiatryonline.org)

## CME INFORMATION TO PARTICIPANTS

**OBJECTIVES.** After evaluating a specific journal article published in the American Journal of Psychiatry, participants should be able to demonstrate an increase in their knowledge of clinical medicine. Participants should be able to understand the contents of a selected research or review article and to apply the new findings to their clinical practice.

**PARTICIPANTS.** This program is designed for all psychiatrists in clinical practice, residents in Graduate Medical Education programs, medical students interested in psychiatry, and other physicians who wish to advance their current knowledge of clinical medicine.

**EXPLANATION OF HOW PHYSICIANS CAN PARTICIPATE AND EARN CREDIT.** In order to earn CME credit, subscribers should read through

the material presented in the article. After reading the article, complete the CME quiz online at [cme.psychiatryonline.org](http://cme.psychiatryonline.org) and submit your evaluation and study hours (up to 1 AMA PRA Category 1 Credit™).

**CREDITS.** The APA designates this educational activity for a maximum of 1 AMA PRA Category 1 Credit™. Physicians should only claim credit commensurate with the extent of their participation in the activity.

The American Psychiatric Association (APA) is accredited by the Accreditation Council for Continuing Medical Education (ACCME) to provide continuing medical education (CME) for physicians.

**Estimated Time to Complete: 1 Hour**  
Begin date November 1, 2006 – End date October 31, 2008

## EXAMINATION QUESTIONS

Select the single best answer for each question below.

### The Relationship Between Antidepressant Prescription Rates and Rate of Early Adolescent Suicide

Robert D. Gibbons et al.

Am J Psychiatry 2006; 163:1898-1904

**QUESTION 1.** U.S. counties with higher rates of SSRI prescriptions were associated with which of the following suicide rates?

- A. Increased child and young adolescent suicide rates
- B. Decreased child and young adolescent suicide rates
- C. No change in child or adolescent suicide rates
- D. Not applicable

**QUESTION 2.** Which of the following population features are associated with the highest child and adolescent suicide rates?

- A. Densely populated areas
- B. Sparsely populated areas
- C. Areas with a high density of psychiatrists
- D. Areas with more wealthy residents

**QUESTION 3.** In the current study, the effect of SSRIs on suicide remained significant after controlling for other factors relating to mental health care access. One factor, the median income for each county, had which of the following associations with suicide?

- A. Income was inversely related to suicide rate
- B. Income had no significant association with suicide
- C. Higher income was associated with increased suicide
- D. Both extremes of income were related to increased suicide

## EVALUATION QUESTIONS

This evaluation form is adapted from the MedBiquitous Journal-Based Continuing Education Guidelines 28 November 2005.

This evaluation will appear online at the end of each CME course. Participants must complete this evaluation in order to receive credit. Select the response which best indicates your reaction to the following statements about this activity.

**STATEMENT 1.** The activity achieved its stated objectives

- 1. Strongly agree
- 2. Agree
- 3. Neutral
- 4. Disagree
- 5. Strongly disagree

**STATEMENT 2.** The activity was relevant to my practice.

- 1. Strongly agree
- 2. Agree
- 3. Neutral
- 4. Disagree
- 5. Strongly disagree

**STATEMENT 3.** I plan to change my current practice based on what I learned in the activity.

- 1. Strongly agree
- 2. Agree
- 3. Neutral
- 4. Disagree
- 5. Strongly disagree

**STATEMENT 4.** The activity validated my current practice.

- 1. Strongly agree
- 2. Agree
- 3. Neutral
- 4. Disagree
- 5. Strongly disagree

**STATEMENT 5.** The activity provided sufficient scientific evidence to support the content presented.

- 1. Strongly agree
- 2. Agree
- 3. Neutral
- 4. Disagree
- 5. Strongly disagree

**STATEMENT 6.** The activity was free of commercial bias toward a particular product or company.

- 1. Strongly agree
- 2. Agree
- 3. Neutral
- 4. Disagree
- 5. Strongly disagree

## Continuing Medical Education

Exams are available online only at [cme.psychiatryonline.org](http://cme.psychiatryonline.org)

### INFORMATION TO PARTICIPANTS

**OBJECTIVES.** After evaluating a specific journal article published in the American Journal of Psychiatry, participants should be able to demonstrate an increase in their knowledge of clinical medicine. Participants should be able to understand the contents of a selected research or review article and to apply the new findings to their clinical practice.

**PARTICIPANTS.** This program is designed for all psychiatrists in clinical practice, residents in Graduate Medical Education programs, medical students interested in psychiatry, and other physicians who wish to advance their current knowledge of clinical medicine.

**EXPLANATION OF HOW PHYSICIANS CAN PARTICIPATE AND EARN CREDIT.** In order to earn CME credit, subscribers should read through

the material presented in the article. After reading the article, complete the CME quiz online at [cme.psychiatryonline.org](http://cme.psychiatryonline.org) and submit your evaluation and study hours (up to 1 AMA PRA Category 1 Credit™).

**CREDITS.** The APA designates this educational activity for a maximum of 1 AMA PRA Category 1 Credit™. Physicians should only claim credit commensurate with the extent of their participation in the activity.

The American Psychiatric Association (APA) is accredited by the Accreditation Council for Continuing Medical Education (ACCME) to provide continuing medical education (CME) for physicians.

**Estimated Time to Complete: 1 Hour**

Begin date November 1, 2006 – End date October 31, 2008

### EXAMINATION QUESTIONS

Select the single best answer for each question below.

#### A Randomized Controlled Trial of a Smoking Cessation Intervention Among People With a Psychotic Disorder

Amanda Baker et al.

Am J Psychiatry 2006; 163:1934-1942

**QUESTION 1.** Among patients with a psychotic disorder, which of the following factors most contributes to an increased likelihood of stopping smoking and achieving abstinence?

- A. Completing all counseling sessions
- B. Achieving an improvement in depressive symptoms
- C. Concurrent treatment with an atypical antipsychotic
- D. Attending approximately five counseling sessions

**QUESTION 2.** In this study of an eight-session, individually administered smoking cessation intervention, what proportion of patients with psychotic disorders completed all visits?

- A. Nearly all participants completed all eight sessions
- B. Less than 10% completed the sessions.
- C. Approximately one-half completed the sessions.
- D. There were no completers.

**QUESTION 3.** In this study, nicotine replacement therapy commencement was associated with which of the following?

- A. A greater incidence of abstinence
- B. A net reduction of five to eight cigarettes per day
- C. A greater likelihood of completing all counseling sessions
- D. No change in number of cigarettes smoked per day

### EVALUATION QUESTIONS

*This evaluation form is adapted from the MedBiquitous Journal-Based Continuing Education Guidelines 28 November 2005. This evaluation will appear online at the end of each CME course. Participants must complete this evaluation in order to receive credit. Select the response which best indicates your reaction to the following statements about this activity.*

**STATEMENT 1.** The activity achieved its stated objectives

- 1. Strongly agree
- 2. Agree
- 3. Neutral
- 4. Disagree
- 5. Strongly disagree

**STATEMENT 2.** The activity was relevant to my practice.

- 1. Strongly agree
- 2. Agree
- 3. Neutral
- 4. Disagree
- 5. Strongly disagree

**STATEMENT 3.** I plan to change my current practice based on what I learned in the activity.

- 1. Strongly agree
- 2. Agree
- 3. Neutral
- 4. Disagree
- 5. Strongly disagree

**STATEMENT 4.** The activity validated my current practice.

- 1. Strongly agree
- 2. Agree
- 3. Neutral
- 4. Disagree
- 5. Strongly disagree

**STATEMENT 5.** The activity provided sufficient scientific evidence to support the content presented.

- 1. Strongly agree
- 2. Agree
- 3. Neutral
- 4. Disagree
- 5. Strongly disagree

**STATEMENT 6.** The activity was free of commercial bias toward a particular product or company.

- 1. Strongly agree
- 2. Agree
- 3. Neutral
- 4. Disagree
- 5. Strongly disagree
