# THE AMERICAN JOURNAL OF PSYCHIATRY

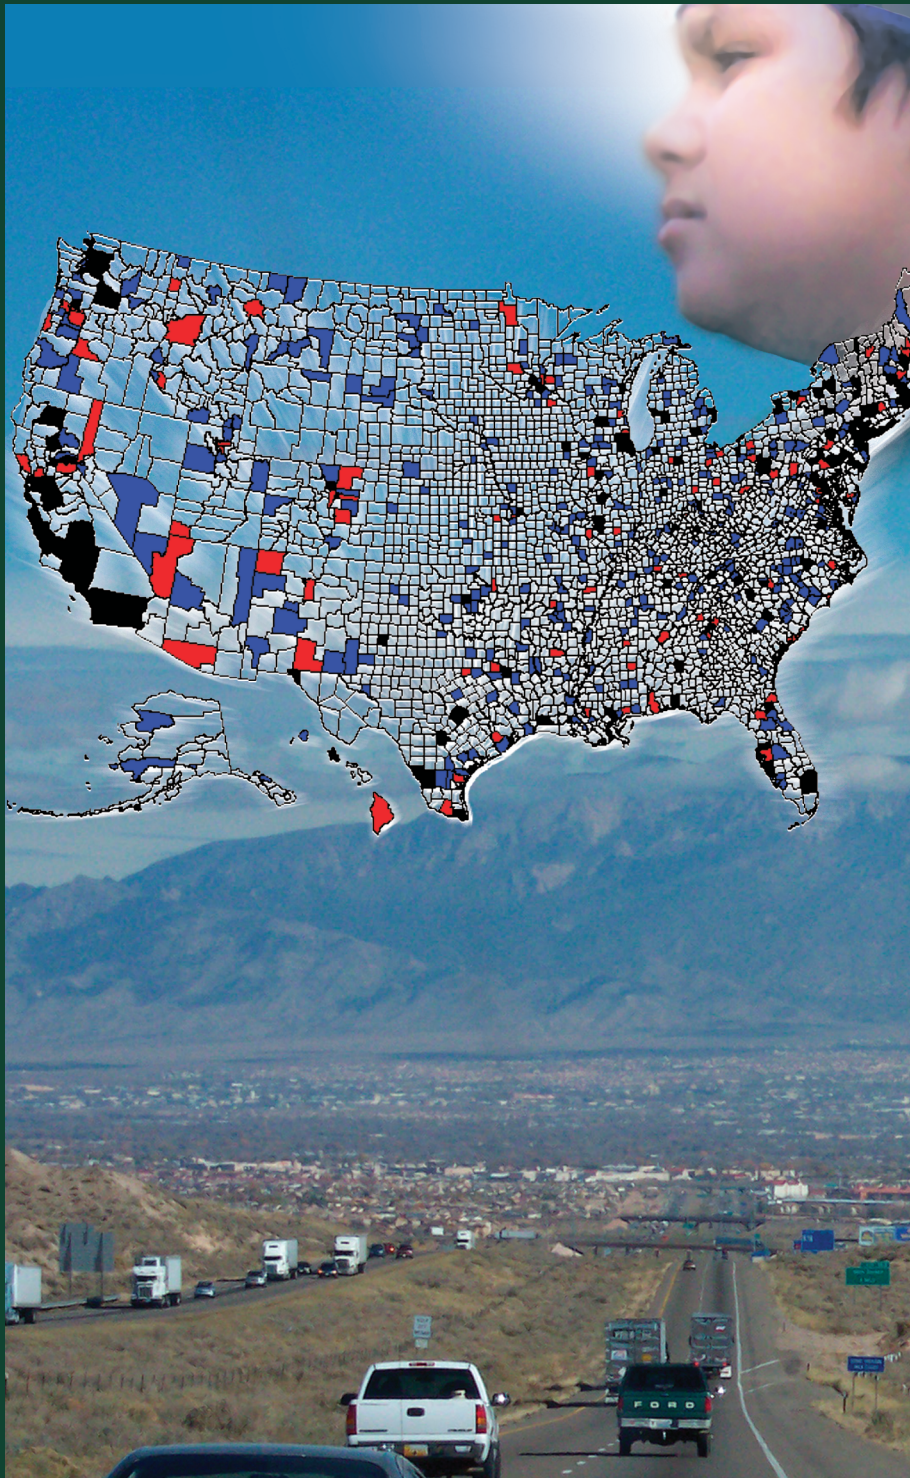

**Treatment in Psychiatry:  
A Clinical Approach to Mild  
Cognitive Impairment**

Paul B. Rosenberg et al.

1884

**The Relationship Between  
Antidepressant Prescription Rates  
and Rate of Early Adolescent Suicide**

Robert D. Gibbons et al.

1898

**Acute and Longer-Term Outcomes in  
Depressed Outpatients Requiring One  
or Several Treatment Steps:  
A STAR\*D Report**

A. John Rush et al.

1905

**Improvement in Social Competence  
With Short-Term Atypical Antipsychotic  
Treatment: A Randomized, Double-  
Blind Comparison of Quetiapine  
Versus Risperidone for Social  
Competence, Social Cognition, and  
Neuropsychological Functioning**

Philip D. Harvey et al.

1918

**Continuing Medical Education** 2026

**November 2006**

**Volume 163 • Number 11**

Official Journal of the  
AMERICAN PSYCHIATRIC ASSOCIATION

[ajp.psychiatryonline.org](http://ajp.psychiatryonline.org)
